# Supplementary material for: Explaining the social patterning of lung function in adulthood at different ages: the roles of childhood precursors, health behaviours and environmental factors
Source: PubMed Central journal article supplement — J Epidemiol Community Health. 2013 Aug 8;67(11):905–11. doi: 10.1136/jech-2012-201704 (PMC3812876; doi:10.1136/jech-2012-201704), 2013-08-08
Supplement: jech-2012-201704-s1.pdf [file jech-2012-201704-s1.pdf]

**Supplementary Table 1:** Slope index of inequality coefficients for FVC (litres) by social class adjusting for covariates in men and women by age group in the 2003 Scottish Health Survey ( $N=7,928$ )

| Age                | Model                                       | Males                  |        |       | %         | Females                |        |       | %         |
|--------------------|---------------------------------------------|------------------------|--------|-------|-----------|------------------------|--------|-------|-----------|
|                    |                                             | SII <sup>a</sup> coeff | 95% CI |       | explained | SII <sup>a</sup> coeff | 95% CI |       | explained |
| <b>18 to 39</b>    |                                             | <b><i>n</i> = 1046</b> |        |       |           | <b><i>n</i> = 1340</b> |        |       |           |
|                    | Survey year, age <sup>b</sup>               | -0.29                  | -0.82  | 0.24  | -         | -0.18                  | -0.38  | 0.02  | -         |
|                    | Height <sup>c</sup> , parental social class | -0.20                  | -0.68  | 0.27  | 30        | -0.06                  | -0.39  | 0.27  | 67        |
|                    | Smoking                                     | -0.27                  | -0.82  | 0.27  | 6         | -0.15                  | -0.36  | 0.05  | 14        |
|                    | Physical activity, weight                   | -0.29                  | -0.83  | 0.26  | 2         | -0.19                  | -0.40  | 0.02  | -6        |
|                    | Second-hand smoke, urban/rural area         | -0.30                  | -0.72  | 0.12  | -2        | -0.20                  | -0.42  | 0.02  | -12       |
|                    | All <sup>d</sup>                            | -0.24                  | -0.65  | 0.18  | 19        | -0.07                  | -0.40  | 0.27  | 62        |
| <b>40 to 64</b>    |                                             | <b><i>n</i> = 1616</b> |        |       |           | <b><i>n</i> = 2015</b> |        |       |           |
|                    | Survey year, age <sup>b</sup>               | -0.52                  | -0.80  | -0.25 | -         | -0.37                  | -0.58  | -0.16 | -         |
|                    | Height <sup>c</sup> , parental social class | -0.11                  | -0.70  | 0.47  | 78        | -0.22                  | -0.55  | 0.11  | 40        |
|                    | Smoking                                     | -0.47                  | -0.75  | -0.19 | 10        | -0.33                  | -0.52  | -0.14 | 11        |
|                    | Physical activity, weight                   | -0.52                  | -0.80  | -0.24 | 1         | -0.33                  | -0.54  | -0.13 | 9         |
|                    | Second-hand smoke, urban/rural area         | -0.44                  | -0.72  | -0.15 | 17        | -0.34                  | -0.54  | -0.14 | 7         |
|                    | All <sup>d</sup>                            | -0.04                  | -0.62  | 0.53  | 92        | -0.15                  | -0.46  | 0.16  | 60        |
| <b>65 and over</b> |                                             | <b><i>n</i> = 837</b>  |        |       |           | <b><i>n</i> = 1074</b> |        |       |           |
|                    | Survey year, age <sup>b</sup>               | -0.54                  | -1.12  | 0.04  | -         | -0.24                  | -0.79  | 0.31  | -         |
|                    | Height <sup>c</sup> , parental social class | -0.41                  | -1.22  | 0.40  | 24        | -0.25                  | -1.00  | 0.50  | -2        |
|                    | Smoking                                     | -0.50                  | -1.07  | 0.07  | 8         | -0.23                  | -0.79  | 0.33  | 5         |
|                    | Physical activity, weight                   | -0.52                  | -1.10  | 0.06  | 4         | -0.22                  | -0.77  | 0.34  | 11        |
|                    | Second-hand smoke, urban/rural area         | -0.43                  | -1.08  | 0.21  | 20        | -0.22                  | -0.74  | 0.29  | 8         |
|                    | All <sup>d</sup>                            | -0.34                  | -1.41  | 0.72  | 36        | -0.21                  | -0.99  | 0.57  | 13        |

a SII: slope index of inequality representing the difference in FVC (in litres) of the most disadvantaged and most advantaged individuals according to social class; b Includes quadratic term for age; c Includes quadratic term for height; d All covariates: Survey year, age, height, parental social class, smoking, physical activity, weight, second-hand smoke and urban/rural area.
